## A beta version of life: p110 $\beta$ takes center stage

Hashem A. Dbouk and Jonathan M. Backer

\* Department of Molecular Pharmacology, Albert Einstein College of Medicine, Bronx, NY, USA

**Correspondence to:** Jonathan M. Backer, email: jonathan.backer@einstein.yu.edu

**Keywords:** PIK3CB, PTEN, lipid kinase, oncogenic transformation

**Received:** December 24, 2010, **Accepted:** December 30, 2010, **Published:** December 30, 2010

Copyright: © Dbouk et al. This is an open-access article distributed under the terms of the Creative Commons Attribution License, which permits unrestricted use, distribution, and reproduction in any medium, provided the original author and source are credited.

### ABSTRACT:

**The PI3K pathway is frequently activated in tumors, most commonly through p110 $\alpha$  mutation or PTEN deletion. In contrast to p110 $\alpha$ , p110 $\beta$  is oncogenic when over-expressed in the wild-type state, suggesting that its regulation by p85 is different than that of p110 $\alpha$ . In this perspective, we summarize recent data concerning the regulation of p110 $\beta$ , which shows that wild-type p110 $\beta$  acts like an oncogenic mutant of p110 $\alpha$ . We also discuss the significance of this altered regulation in tumor models of PTEN deletion, as well as the potential implications of the unique p110 $\beta$  regulation on GPCR-driven tumorigenesis.**

Phosphoinositide 3-kinases (PI3Ks) are a family of enzymes that catalyze the phosphorylation of the D3 hydroxyl of the inositol ring in phosphoinositides. The three classes of PI3Ks are distinguished by sequence homology and substrate specificity *in vivo* [1]. Class I PI3Ks signal downstream from Receptor Tyrosine Kinases (RTKs) and G-protein coupled receptors (GPCRs) and phosphorylate PI(4,5)P<sub>2</sub> to generate PI(3,4,5)P<sub>3</sub> (PIP<sub>3</sub>), an important second messenger that recruits proteins containing a PH domain [2]. Class IA PI3Ks are obligate heterodimers of a catalytic subunit (p110 $\alpha$ ,  $\beta$ ,  $\delta$ ) with regulatory subunit (p85 $\alpha$ , p85 $\beta$ , p55 $\alpha$ , p50 $\alpha$ , and p55 $\gamma$ ), and Class IB PI3Ks are dimers of a p110 $\gamma$  catalytic subunit and p101 or p87 regulatory subunits. The canonical classification of PI3Ks defines Class IA PI3Ks as signaling downstream from RTKs [3], whereas Class IB PI3Ks signal downstream from GPCRs [1]. This distinction has been questioned by data showing that the p110 $\beta$  isoform of class IA PI3Ks is activated by G $\beta\gamma$  subunits downstream of GPCRs, similar to p110 $\gamma$  [4-7]. A large number of recent studies has defined signaling differences between the p110 $\beta$  and the p110 $\alpha$  catalytic subunits (reviewed in [8]).

Class I PI3K signaling is frequently amplified in tumors, most commonly by activating mutations in PIK3CA (which codes for p110 $\alpha$ ) and disabling mutation or deletion of PTEN (phosphatase and tensin homolog) [9]. In contrast to p110 $\alpha$ , no oncogenic mutations have been found in any of the other class I PI3K catalytic subunits. However, p110 $\alpha$  is only oncogenic when mutated, whereas p110- $\beta$ , - $\gamma$ , and - $\delta$  are oncogenic when

expressed in their wild-type form [10]. This suggests that the regulation of p110 $\beta$  and p110 $\delta$  is different than that of p110 $\alpha$ . Recent studies have shown that p110 $\beta$  but not p110 $\alpha$  has essential roles in tumorigenesis in PTEN-null mouse models and cell lines [11, 12]. p110 $\beta$  has also been implicated in the growth of ErbB2-driven mammary tumors [13] and in Ras-driven tumors [12]. Thus, defining the mechanism of p110 $\beta$  regulation could have important clinical implications.

We have previously shown that C2-iSH2 contacts formed by N345 of p110 $\alpha$  with D560/N564 in p85 are required for full inhibition of p110 $\alpha$  activity by p85. These contacts are disrupted by an N345K mutation in p110 and by point mutants (p85D560K/N564K) or truncations (p85-572<sup>STOP</sup>) in p85 [14, 15]. Furthermore, we described an assay to measure the presence or loss of the C2-iSH2 interface. Wild-type p110 $\alpha$  is strongly inhibited by p85 but minimally inhibited by p85D560K/N564K or p85-572<sup>STOP</sup>. In contrast, p110 $\alpha$ -N345K shows the same minimal inhibition by wild type p85 or the p85D560K/N564K and p85-572<sup>STOP</sup> mutants. Therefore, the differential regulation of p110 molecules by wild-type versus mutant p85 can be used to detect the presence of an intact C2-iSH2 interface.

We have now used this assay to study the regulation of p110 $\beta$  as compared to the other class IA PI3K catalytic subunits, p110 $\alpha$  and p110 $\delta$  [16]. Sequence alignment of p110 $\beta$  with p110 $\alpha$  shows a crucial difference in the C2 domain of p110 $\beta$ , with K342 of p110 $\beta$  aligned with N345 of p110 $\alpha$ . This makes wild-type p110 $\beta$  analogous to the oncogenic p110 $\alpha$  mutant N345K. Using our

assay for the C2-iSH2 interface, we showed that p110 $\beta$  is minimally inhibited by wild-type p85 or p85 572<sup>STOP</sup>, similar to the p110 $\alpha$  N345K mutant. A mutant p110 $\beta$ -K342N that mimics the C2-iSH2 interface in p110 $\alpha$  is less transforming than wild-type p110 $\beta$ , and shows a gain-of-function for differential regulation by wild-type p85 versus p85-572<sup>STOP</sup>. p110 $\beta$ -K342N is still regulated by G $\beta$  subunits, similar to wild-type p110 $\beta$ .

Further analysis of the role of the C2-iSH2 interface in the transforming potential of p110 $\beta$  was performed using p110 $\alpha/\beta$  chimeras. Chimeric p110 $\alpha/\beta$  molecules having the C2 of p110 $\alpha$  showed decreased transforming potential as compared to p110 $\beta$ , whereas a p110 $\alpha/\beta$  chimera containing the C2 domain of p110 $\beta$  shows the high transforming potential characteristic of p110 $\beta$ . Our data show that the transforming potential of p110 $\beta$  is due, at least in part, to the disruption of the inhibitory interface between the C2 of p110 $\beta$  and the iSH2 domain of p85, which leads to high basal p110 $\beta$  signaling [16]. In contrast

to p110 $\beta$ , p110 $\delta$  showed the differential regulation by wild type versus mutant p85 that is characteristic of an intact C2-iSH2 interface. Given that p110 $\delta$  is also transforming in its wild type state, its enhanced transforming potential must be due to other factors [16].

In addition to the impact of a disrupted C2-iSH2 interface on the transforming potential of p110 $\beta$ , the loss of p85 inhibition might explain the inability of p110 $\beta$  to signal downstream of receptor tyrosine kinases [7]. Activation of class IA PI3Ks by phosphopeptides involves the disruption of an inhibitory contact between the nSH2 domain of p85 and the helical domain of p110 [17]. If p110 $\beta$  is less inhibited by p85 under basal conditions, this would lead to a loss of activation of p85/p110 $\beta$  dimers by activated RTKs. This is supported by recent data showing that cancer specific p85 mutations in the nSH2 and iSH2 domains function solely through p110 $\alpha$ , not p110 $\beta$  [18].

Several studies have suggested that p110 $\beta$  is the sole class IA PI3K catalytic subunit required for initiation and

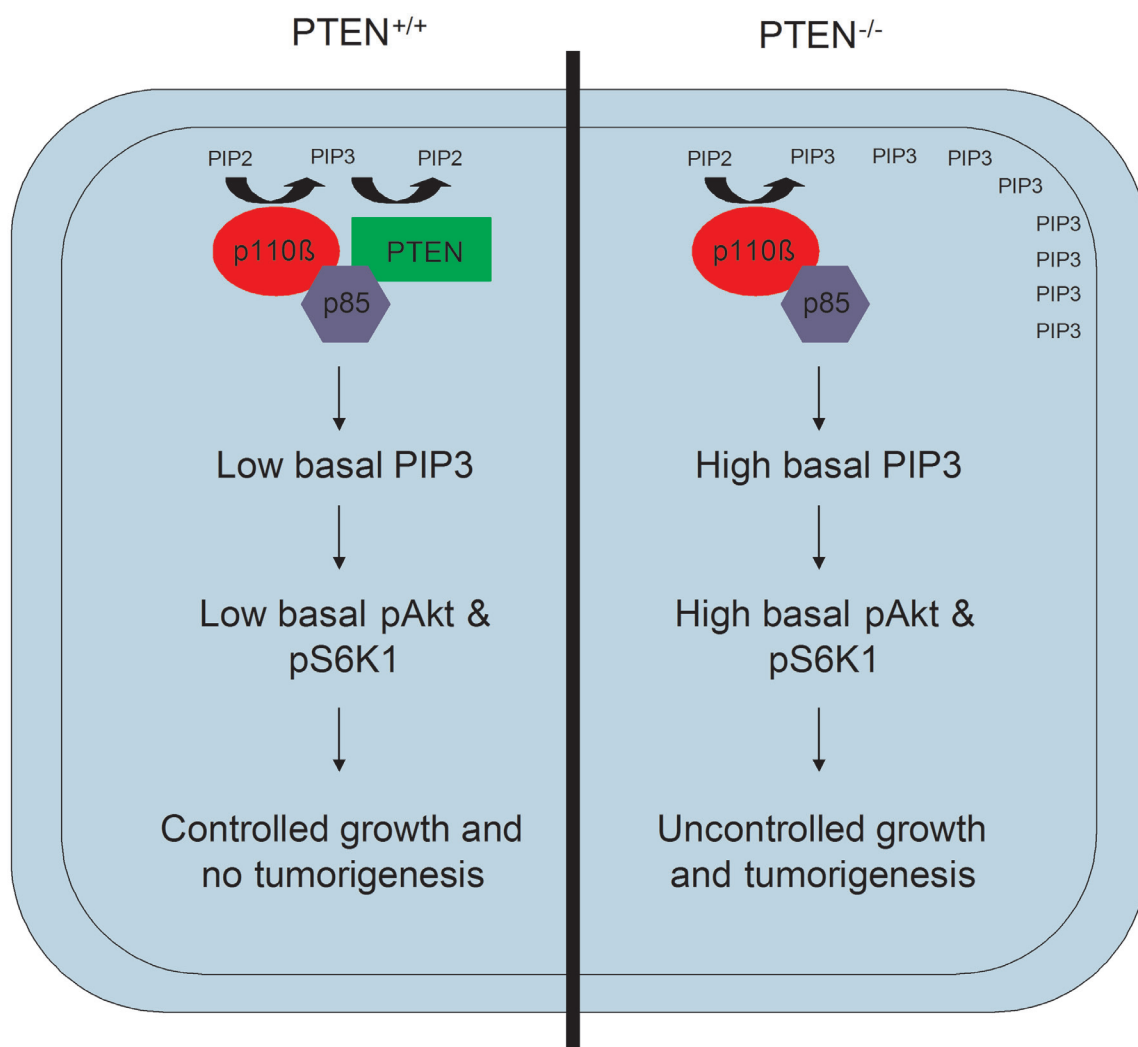

**Figure 1: Model for p110 $\beta$  dependency in PTEN null tumors.** p85 binds to both p110 $\beta$  and PTEN, allowing negative regulation of basal p110 $\beta$  activity by PTEN. This ensures that normal (PTEN<sup>+/+</sup>) cells maintain a low basal level of PIP3 at the plasma membrane, leading to low basal signaling and controlled cell growth. In contrast, in PTEN<sup>-/-</sup> cells, basal p110 $\beta$  activity is not countered by p85/p110 $\beta$ -associated PTEN, leading to high basal PIP3 levels in the membrane, enhanced activation of Akt and S6K1, and uncontrolled cell growth and tumorigenesis.

maintenance of PTEN-null driven tumors [11, 12, 19]. It is also interesting that PTEN seems to specifically associate with p85/p110 $\beta$ , an interaction mediated by the SH3 and BH domains of p85 and leading to enhanced PTEN catalytic activity [20, 21]. The association of p110 $\beta$  with PTEN is consistent with our data showing that purified p110 $\beta$  is relatively active under basal conditions [16], as it provides a regulatory mechanism to prevent uncontrolled signaling in normal cells. Thus, under normal growth conditions, the activity of p110 $\beta$  is antagonized by the PTEN associated with the p85/p110 $\beta$  dimer, thereby controlling steady-state PIP3 levels. However, in conditions where PTEN expression or activity is lost, the activity of p110 $\beta$  is no longer countered by the phosphatase activity of PTEN, leading to high levels of PIP3 and downstream signaling. This may provide a model for the deregulation of PI3K signaling and p110 $\beta$ -dependence of PTEN-null tumors (Figure 1). It is also interesting to note that PTEN has been shown to function downstream of anti-migratory GPCRs [22] and to negatively regulate CXCR4-mediated chemotaxis [23]. This suggests that PTEN might also be acting as a negative regulator of p110 $\beta$  activation downstream of GPCRs involved in the regulation of cell motility.

p110 $\beta$  is essential for survival and has unique functions that are not redundant with other class IA PI3K catalytic subunits, as knockout mice show embryonic lethality [24]. p110 $\beta$  is the sole class IA PI3K subunit that signals downstream of GPCRs via direct G $\beta\gamma$  binding and activation, and the only GPCR-regulated PI3K in non-hematopoietic cells. The mechanism of G $\beta\gamma$ -mediated regulation of p110 $\beta$  is not well characterized. Previous studies with p110 $\gamma$  have shown that G $\beta\gamma$  binds to N-terminal and C-terminal regions of p110 $\gamma$  and activates the kinase activity of p110 $\gamma$  [25]. G $\beta\gamma$  also binds to p101 to mediate membrane recruitment of the p101/p110 $\gamma$  complex [26]. For p110 $\beta$ , activation requires direct interaction of G $\beta\gamma$  subunits with the p110 $\beta$  catalytic subunit and appears to be independent of the p85 regulatory subunit [27]. Using chimeric p110 $\alpha/\beta$  molecules, we have narrowed the interaction interface with G $\beta\gamma$  to the helical-kinase domains of p110 $\beta$  [16]. Further delineation of this interacting interface will be important for targeting the subset of p110 $\beta$  functions that are downstream of GPCRs. Mutations in the G $\beta\gamma$  binding site of p110 $\beta$  will be important for defining the role of p110 $\beta$  in initiating GPCR-driven tumors, and for studying its contribution to invasion and metastasis triggered by GPCR ligands.

In addition to transmitting signals downstream of GPCRs, p110 $\beta$  has been shown to be essential for clathrin-mediated endocytosis [12, 13] and autophagy [28]. These roles are suggested to be mediated by interactions with Rab5, and are unique in that they are kinase-independent functions of p110 $\beta$ . Furthermore, p110 $\beta$  regulates integrin mediated signaling in platelets [29, 30], and may have important antithrombotic roles [31]. This is intriguing

because integrin signaling and integrin and focal adhesion endocytosis, which is mediated by clathrin [32], are essential for cell migration [33]. It will be important to determine whether the role of p110 $\beta$  in endocytosis is related to its functions in cancer cell migration and invasion.

p110 $\beta$  is unique among the class IA PI3Ks, both in terms of functions and regulation. The isoform-specific regulation of p110 $\beta$  by G $\beta\gamma$  and Rab5, as well as its critical roles in a subset of tumor types, may lead to novel therapeutic approaches for the treatment of human cancer.

## ACKNOWLEDGEMENTS

This work was funded by NIH grant GM55692 and NCI grant CA100324(J.M.B.).

## REFERENCES

1. Engelman JA, Luo J, Cantley LC. The evolution of phosphatidylinositol 3-kinases as regulators of growth and metabolism. *Nature Reviews of Genetics*. 2006; 7: 606-619.
2. Cantley LC. The phosphoinositide 3-kinase pathway. *Science*. 2002; 296: 1655-1657.
3. Geering B, Cutillas PR, Nock G, Gharbi SI, Vanhaesebroeck B. Class IA phosphoinositide 3-kinases are obligate p85-p110 heterodimers. *Proc Natl Acad Sci U S A*. 2007; 104: 7809-7814.
4. Kurosu H, Maehama T, Okada T, Yamamoto T, Hoshino S, Fukui Y, Ui M, Hazeki O, Katada T. Heterodimeric phosphoinositide 3-kinase consisting of p85 and p110beta is synergistically activated by the betagamma subunits of G proteins and phosphotyrosyl peptide. *J Biol Chem*. 1997; 272: 24252-24256.
5. Murga C, Fukuhara S, Gutkind JS. A novel role for phosphatidyl 3-kinase  $\beta$  in signaling from G protein-coupled receptors to Akt. *J Biol Chem*. 2000; 275: 12069-12073.
6. Kubo H, Hazeki K, Takasuga S, Hazeki O. Specific role for p85/p110 $\beta$  in GTP-binding-protein-mediated activation of Akt. *Biochemical Journal*. 2005; 392: 607-614.
7. Guillermet-Guibert J, Bjorklof K, Salpekar A, Gonella C, Ramadani F, Bilancio A, Meek S, Smith AJ, Okkenhaug K, Vanhaesebroeck B. The p110beta isoform of phosphoinositide 3-kinase signals downstream of G protein-coupled receptors and is functionally redundant with p110gamma. *Proc Natl Acad Sci U S A*. 2008; 105: 8292-8297.
8. Ilic N, Roberts TM. Comparing the roles of the p110 $\alpha$  and the p110 $\beta$  isoforms of PI3K in signaling and cancer. *Current Topics in Microbiology and Immunology*. 2011; 347: 55-77.
9. Engelman JA. Targeting PI3K signaling in cancer:

- opportunities, challenges and limitations. *Nature Reviews of Cancer*. 2009; 9: 550-562.
10. Kang S, Denley A, Vanhaesebroeck B, Vogt PK. Oncogenic transformation induced by the p110beta, -gamma, and -delta isoforms of class I phosphoinositide 3-kinase. *Proc Natl Acad Sci U S A*. 2006; 103: 1289-1294.
  11. Wee S, Wiederschain D, Maira SM, Loo A, Miller C, deBeaumont R, Stegmeier F, Yao YM, Lengaur C. PTEN-deficient cancers depend on PIK3CB. *Proc Natl Acad Sci U S A*. 2008; 105: 13057-13062.
  12. Jia S, Liu Z, Zhang S, Liu P, Zhang L, Lee SH, Zhang J, Signoretti S, Loda M, Roberts TM, Zhao JJ. Essential roles of PI(3.K-p110beta in cell growth, metabolism and tumorigenesis. *Nature*. 2008; 454: 776-779.
  13. Ciraolo E, Iezzi M, Marone R, Marengo S, Curcio C, Costa C, Azzolino O, Gonella C, Rubinetto C, Wu H, Dastru W, Martin EL, Silengo L, Altruda F, Turco E, Lanzetti L, et al. Phosphoinositide 3-kinase p110beta activity: Key role in metabolism and mammary gland cancer but not development. *Sci Signal*. 2008;1: ra3.
  14. Huang C-H, Mandelker D, Schmidt-Kittler O, Samuels Y, Velculescu VE, Kinzler KW, Vogelstein B, Gabelli SB, Amzel LM. The structure of a human p110 $\alpha$ /p85 $\alpha$  complex elucidates the effects of oncogenic PI3K $\alpha$  mutations. *Science*. 2007; 318: 1744-1748.
  15. Wu H, Shekar SC, Flinn RJ, El-Sibai M, Jaiswal BS, Sen KI, Janakiraman V, Seshagiri S, Gerfen GJ, Girvin ME, and Backer JM. Regulation of class IA PI 3-kinases: C2 domain-iSH2 domain contacts inhibit p85/p110alpha and are disrupted in oncogenic p85 mutants. *Proc Natl Acad Sci U S A*. 2009; 106: 20258-20263.
  16. Dbouk, HA, Pang, H, Fiser, A, and Backer, JM. A biochemical mechanism for the oncogenic potential of the p110 $\beta$  catalytic subunit of phosphoinositide 3-kinase. *Proc Natl Acad Sci U S A*. 2010; 107: 19897-19902.
  17. Miled N, Yan Y, Hon W-C, Perisic O, Zvebil M, Inbar Y, Schneidman-Duhovny D, Wolfson HJ, Backer JM, Williams RL. Mechanism of two classes of cancer mutations in the phosphoinositide 3-kinase catalytic subunit. *Science*. 2007; 317: 239-242.
  18. Sun M, Hillmann P, Hofmann BT, Hart JR, Vogt PK. Cancer -derived mutations in the regulatory subunit p85 $\alpha$  of phosphoinositide 3-kinase function through the catalytic subunit p110 $\alpha$ . *Proc Natl Acad Sci U S A*. 2010; 107: 15547-15552.
  19. Hill KM, Kalifa S, Das JR, Bhatti T, Gay M, Williams D, Taliferro-Smith L, De Marzo AM. The role of PI 3-kinase p110beta in Akt signally, cell survival, and proliferation in human prostate cancer cells. *Prostate*. 2010; 70: 755-64.
  20. Rabinovsky R, Pochanard P, McNear C, Brachmann SM, Duke-Cohan JS, Garraway LA, Sellers WR. p85 associates with unphosphorylated PTEN and the PTEN-associated complex. *Mol Cell Biol*. 2009; 29: 5377-88.
  21. Chagpar RB, Links PH, Pastor MC, Furber LA, Hawrysh AD, Chamberlain MD, Anderson DH. Direct positive regulation of PTEN by the p85 subunit of phosphatidylinositol 3-kinase. *Proc Natl Acad Sci U S A*. 2010; 107: 5471-6.
  22. Sanchez T, Thangada S, Wu MT, Kondos CT, Wu D, Wu H, Hla T. PTEN as an effector in the signaling of antimigratory G protein-coupled receptor. *Proc Natl Acad Sci U S A*. 2005; 102: 4312-7.
  23. Bi L, Okabe I, Bernard DJ, and Nussbaum RL (2002. Early embryonic lethality in mice deficient in the p110 $\beta$  catalytic subunit of PI 3-kinase. *Mammalian Genome*. 2002; 13: 169-172.
  24. Gao P, Wange RL, Zhang N, Oppenheim JJ, Howard OM. Negative regulation of CXCR4-mediated chemotaxis by the lipid phosphatase activity of tumor suppressor PTEN. *Blood*. 2005; 106: 2619-26.
  25. Leopoldt D, Hanck T, Exner T, Maier U, Wetzker R, Nurnberg B. G $\beta\gamma$  stimulates phosphoinositide 3-kinase- $\gamma$  by direct interaction with two domains of the catalytic p110 subunit. *The Journal of Biological Chemistry*. 1998; 273: 7024-7029.
  26. Brock C, Schaefer M, Reusch HP, Czupalla C, Michalke M, Spicher K, Schultz G, Nurnberg B. Roles of G beta gamma in membrane recruitment and activation of p110 gamma/p101 phosphoinositide 3-kinase gamma. *J Cell Biol*. 2003; 160: 89-99.
  27. Maier U, Babich A, Nurnberg B. Roles of non-catalytic subunits in G $\beta\gamma$ -induced activation of class I phosphoinositide 3-kinase isoforms  $\beta$  and  $\gamma$ . *J Biol Chem*. 1999; 274: 29311-29317.
  28. Dou Z, Chattopadhyay M, Pan J-A, Guerriero JL, Jiang Y-P, Ballou LM, Yue Z, Lin RZ, Zong W-X. The class IA phosphatidylinositol 3-kinase p110- $\beta$  subunit is a positive regulator of autophagy. *J Cell Biol*. 2010; 191: 827-843.
  29. Canobbio I, Stefanini L, Cipolla L, Ciraolo E, Gruppi C, Balduini C, Hirsch E, Torti M. Genetic evidence for a predominant role of PI3Kbeta catalytic activity in ITAM- and integrin-mediated signaling in platelets. *Blood*. 2009; 114: 2193-6.
  30. Schoenwalder SM, Ono A, Nesbitt WS, Lim J, Jarman K, Jackson SP. Phosphoinositide 3-kinase p110 beta regulates integrin alpha IIb beta 3 avidity and the cellular transmission of contractile forces. *J Biol Chem*. 2010; 285: 2886-96.
  31. Jackson SP, Schoenwaelder SM, Goncalves I, Nesbitt WS, Yap CL, Wright CE, Kenche V, Anderson KE, Dopheide SM, Yuan Y, Sturgeon SA, Prabakaran H, Thompson PE, Smith GD, Shepherd PR, Daniele N, et al. PI 3-kinase p110beta: a new target for antithrombotic therapy. *Nat Med*. 2005; 11: 507-514.
  32. Ezratty EJ, Bertaux C, Marcantonio EE, Gundersen GG. Clathrin mediates integrin endocytosis for focal adhesion disassembly in migrating cells. *J Cell Biol*. 2009; 187: 733-47.

33. Desgrosellier JS, Cheresh DA. Integrins in cancer: biological implications and therapeutic opportunities. *Nature Reviews of Cancer*. 2010; 10: 9-22.
